# Supplementary material for: Assessment of Antioxidant, Immunomodulatory Activity of Oxidised Epigallocatechin-3-Gallate (Green Tea Polyphenol) and Its Action on the Main Protease of SARS-CoV-2—An In Vitro and In Silico Approach
Source: MDPI journal article supplement (doi:10.3390/antiox11020294), 2022-01-31
Supplement: s1 [file s1]

Supplementary table

**Table S1.** Binding site and grid box of the IL-I, IL-6, TNF- $\alpha$  of human and Main protease of SARS-CoV-2.

| S. No | Name of the protein | Grid box |        |       | Binding site residues                                                                                                                        |
|-------|---------------------|----------|--------|-------|----------------------------------------------------------------------------------------------------------------------------------------------|
|       |                     | X        | Y      | Z     |                                                                                                                                              |
| 1     | IL-1                | 37.40    | 11.60  | 14.92 | Chain A: Arg11, Gln14, Gln15, Lys27, Gln32, Gly33, Gln34, Glu128                                                                             |
|       |                     |          |        |       | Chain B: Ala1, Agr4, Glu51, Lys93, Lys94, Glu105, and Asn108                                                                                 |
| 2     | IL-6                | -6.86    | -13.37 | 0.2   | Gln175, Arg179, Glu178, Arg182,                                                                                                              |
| 3     | TNF- $\alpha$       | -18.62   | 74.43  | 42.05 | Chain A: Leu57, Tyr59, Ser60, Tyr119, Leu120, Gly121, Tyr151                                                                                 |
|       |                     |          |        |       | Chain B: Leu55, Leu57, Tyr59, Ser60, Tyr119, Leu120, Gly121, Tyr151                                                                          |
| 4     | Main protease       | -10.28   | 12.57  | 68.21 | Thr24, His41, Phe140, Leu141, Asn142, Gly143, Cys145, His163, His164, Met165, Glu166, Pro168, Gln189, His172, Gln189, Thr190, Ala191, Gln192 |
